# Supplementary material for: Oxaliplatin complexes with carnosine and its derivatives: in vitro cytotoxicity, mass spectrometric and computational studies with a focus on complex fragmentation
Source: Royal Society of Chemistry journal article supplement (doi:10.1039/c3mt00180f), 2013-01-01
Supplement: c3mt00180f_2.pdf [file c3mt00180f_2.pdf]

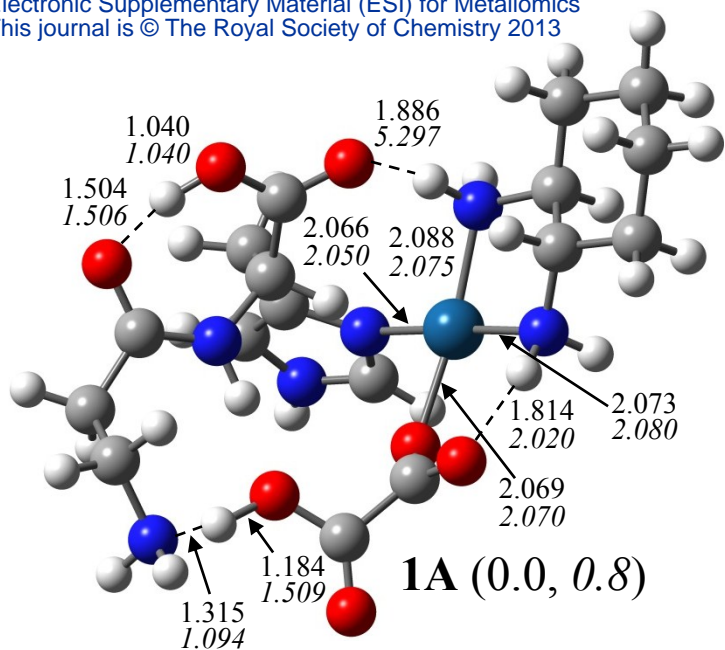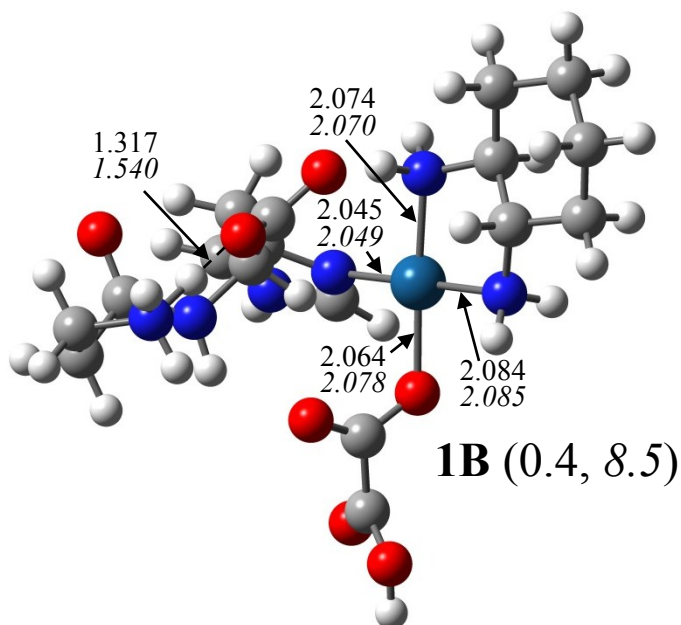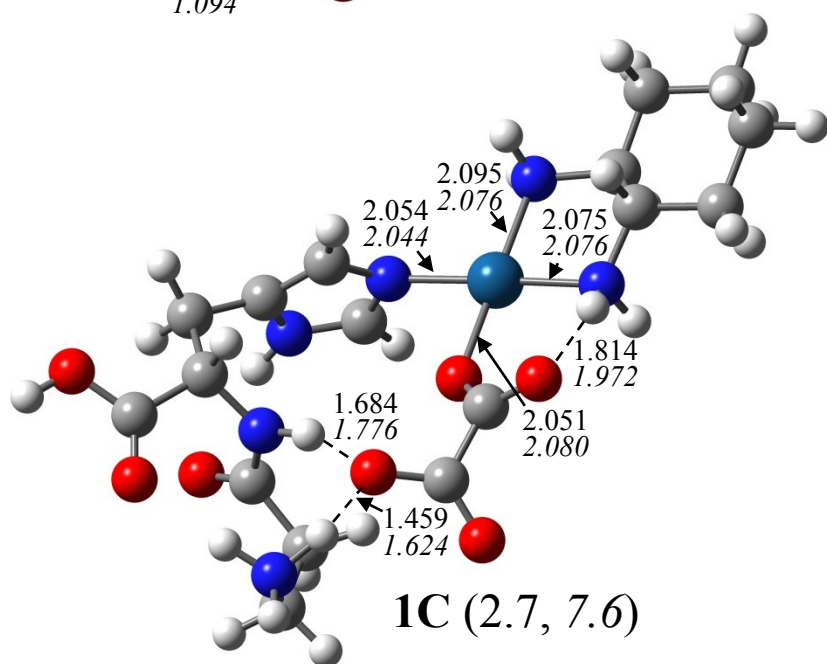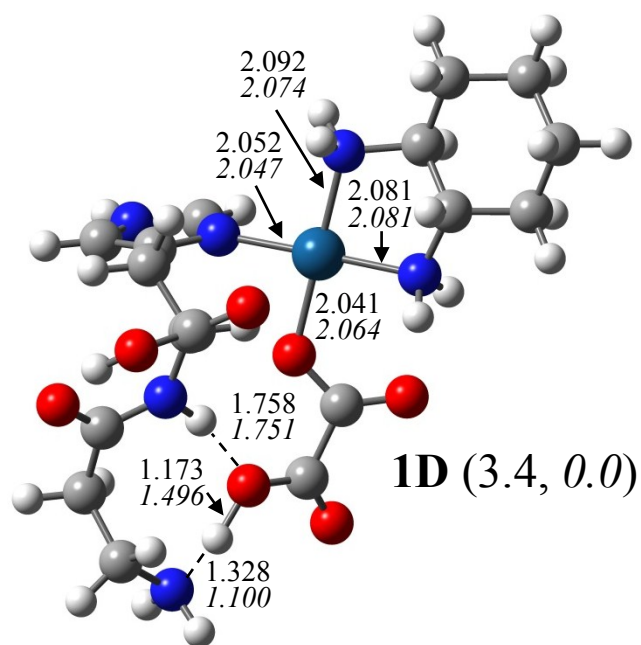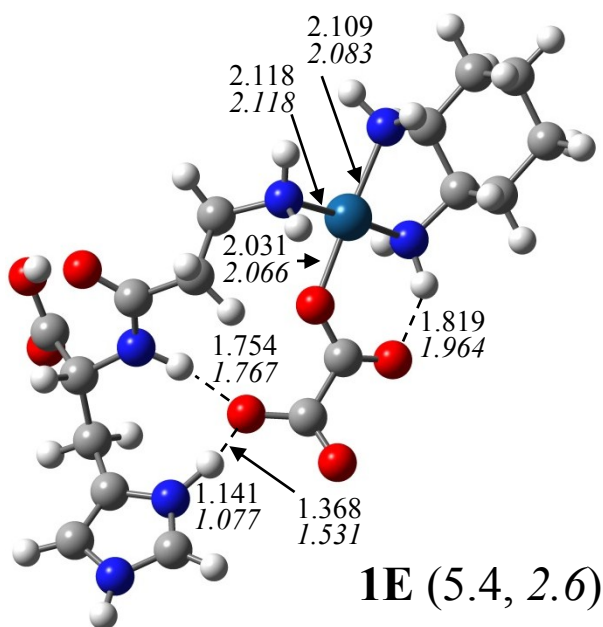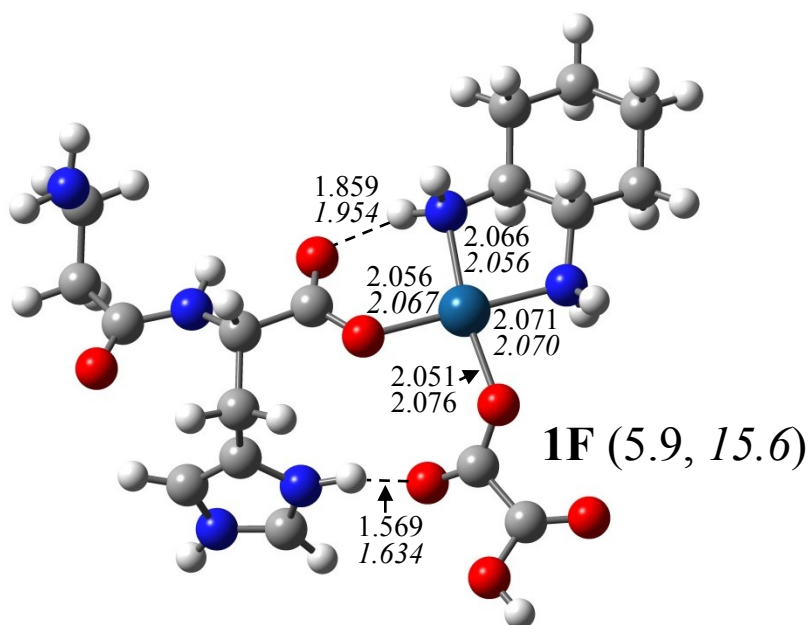

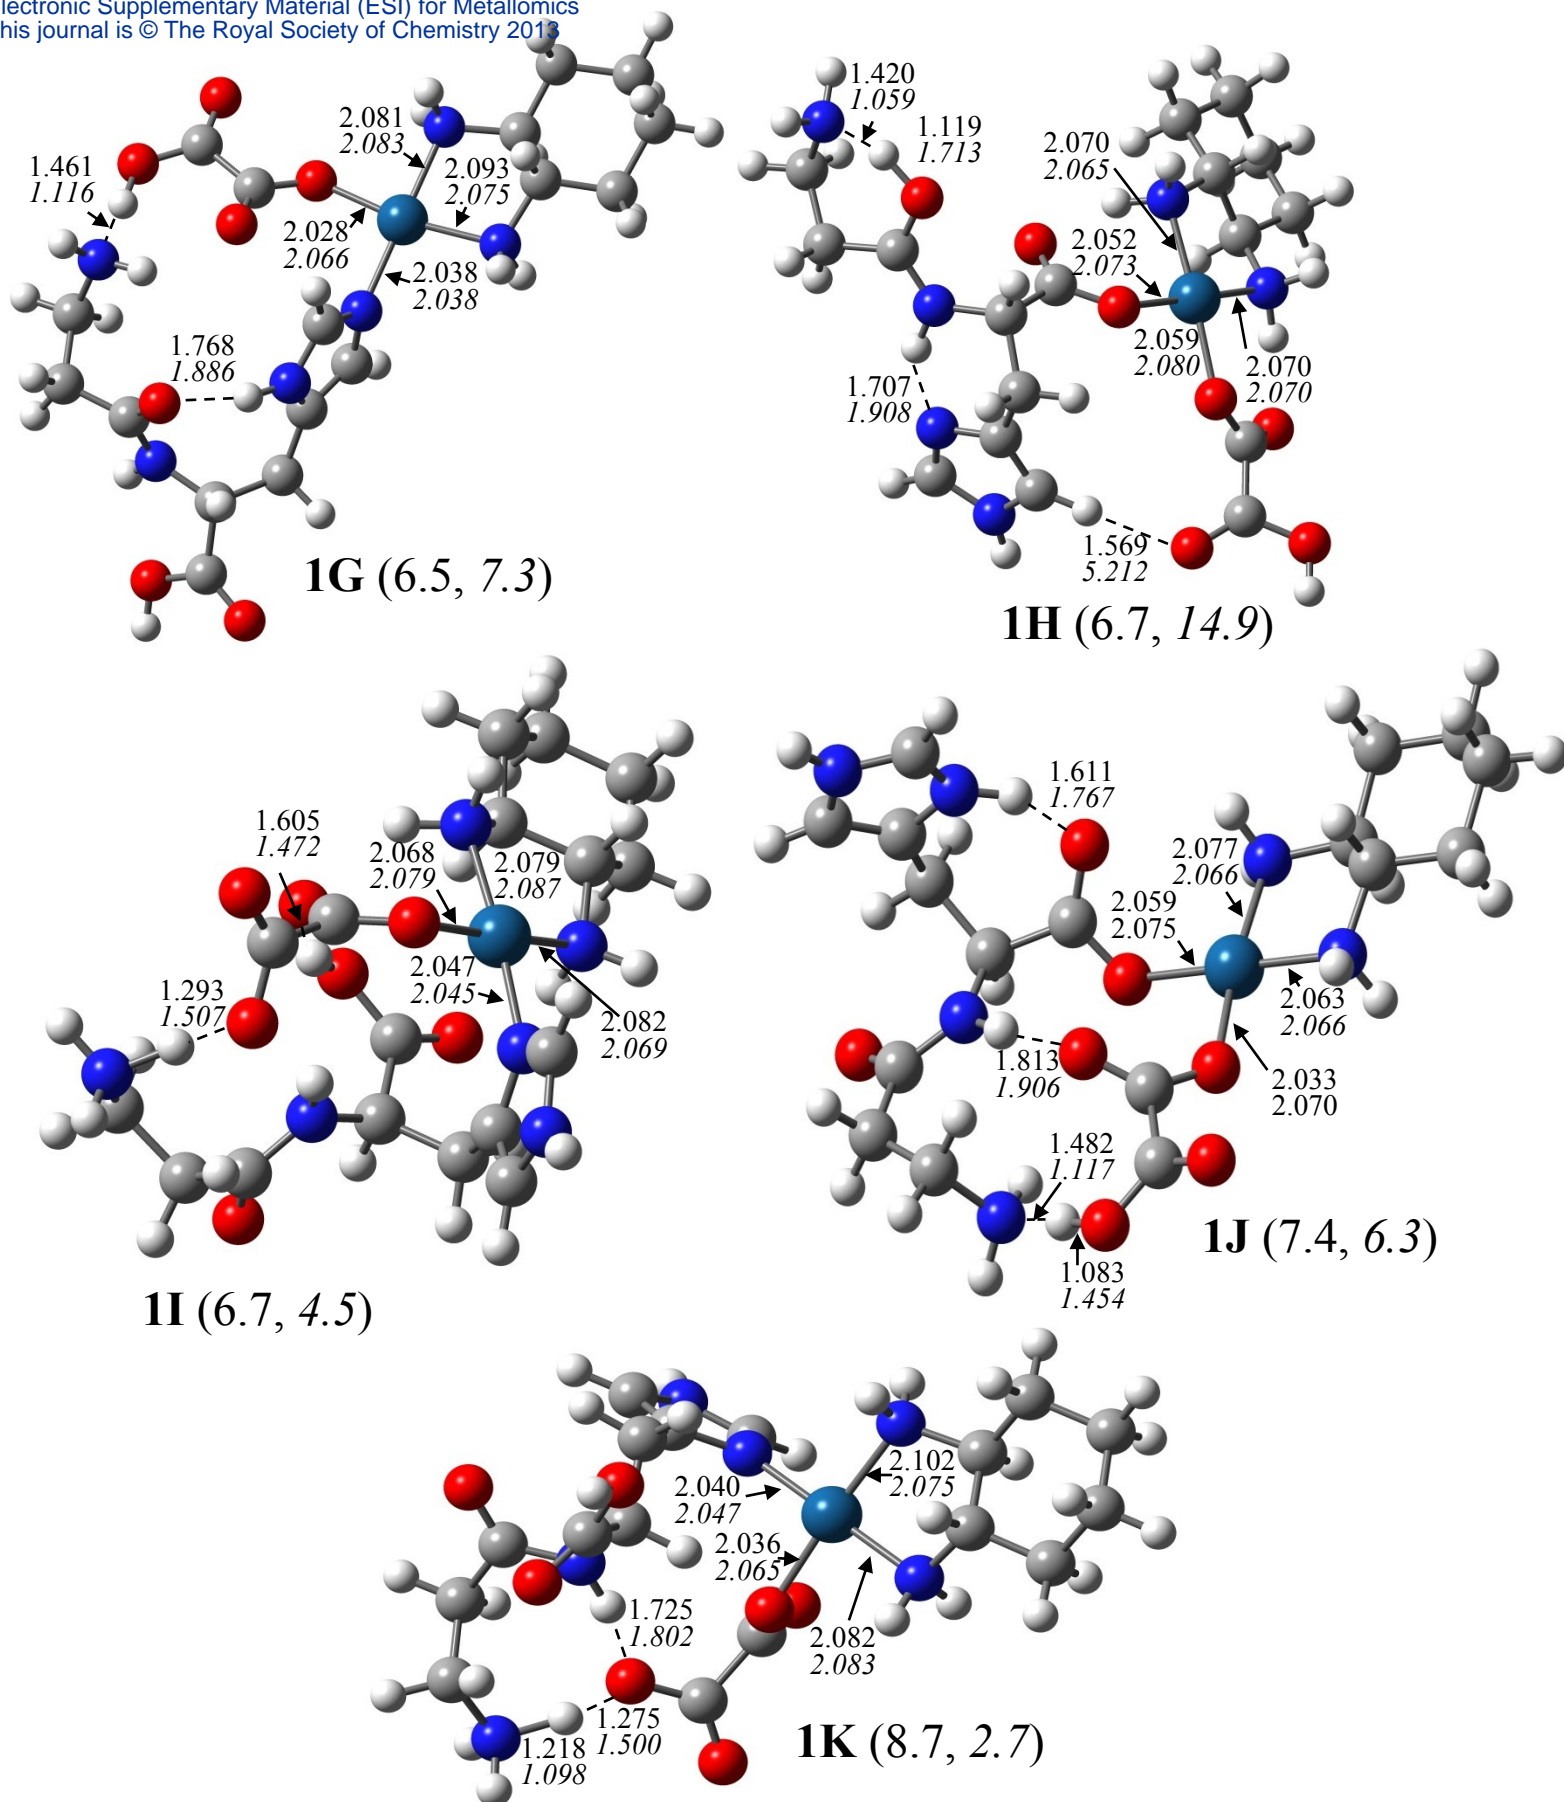

Figure S12: Structures for  $[\text{Carnosine} + \text{OxPt} + \text{H}]^+$  ions in which a formal Pt coordination to carnosine is observed as calculated at the B3LYP/LANL2DZ level of theory. Bond lengths are in Angstroms, relative free energies are indicated in parenthesis. Italicized numbers are for solvated species.
