# Supplementary material for: Oxaliplatin complexes with carnosine and its derivatives: in vitro cytotoxicity, mass spectrometric and computational studies with a focus on complex fragmentation
Source: Royal Society of Chemistry journal article supplement (doi:10.1039/c3mt00180f), 2013-01-01
Supplement: c3mt00180f_4.pdf [file c3mt00180f_4.pdf]

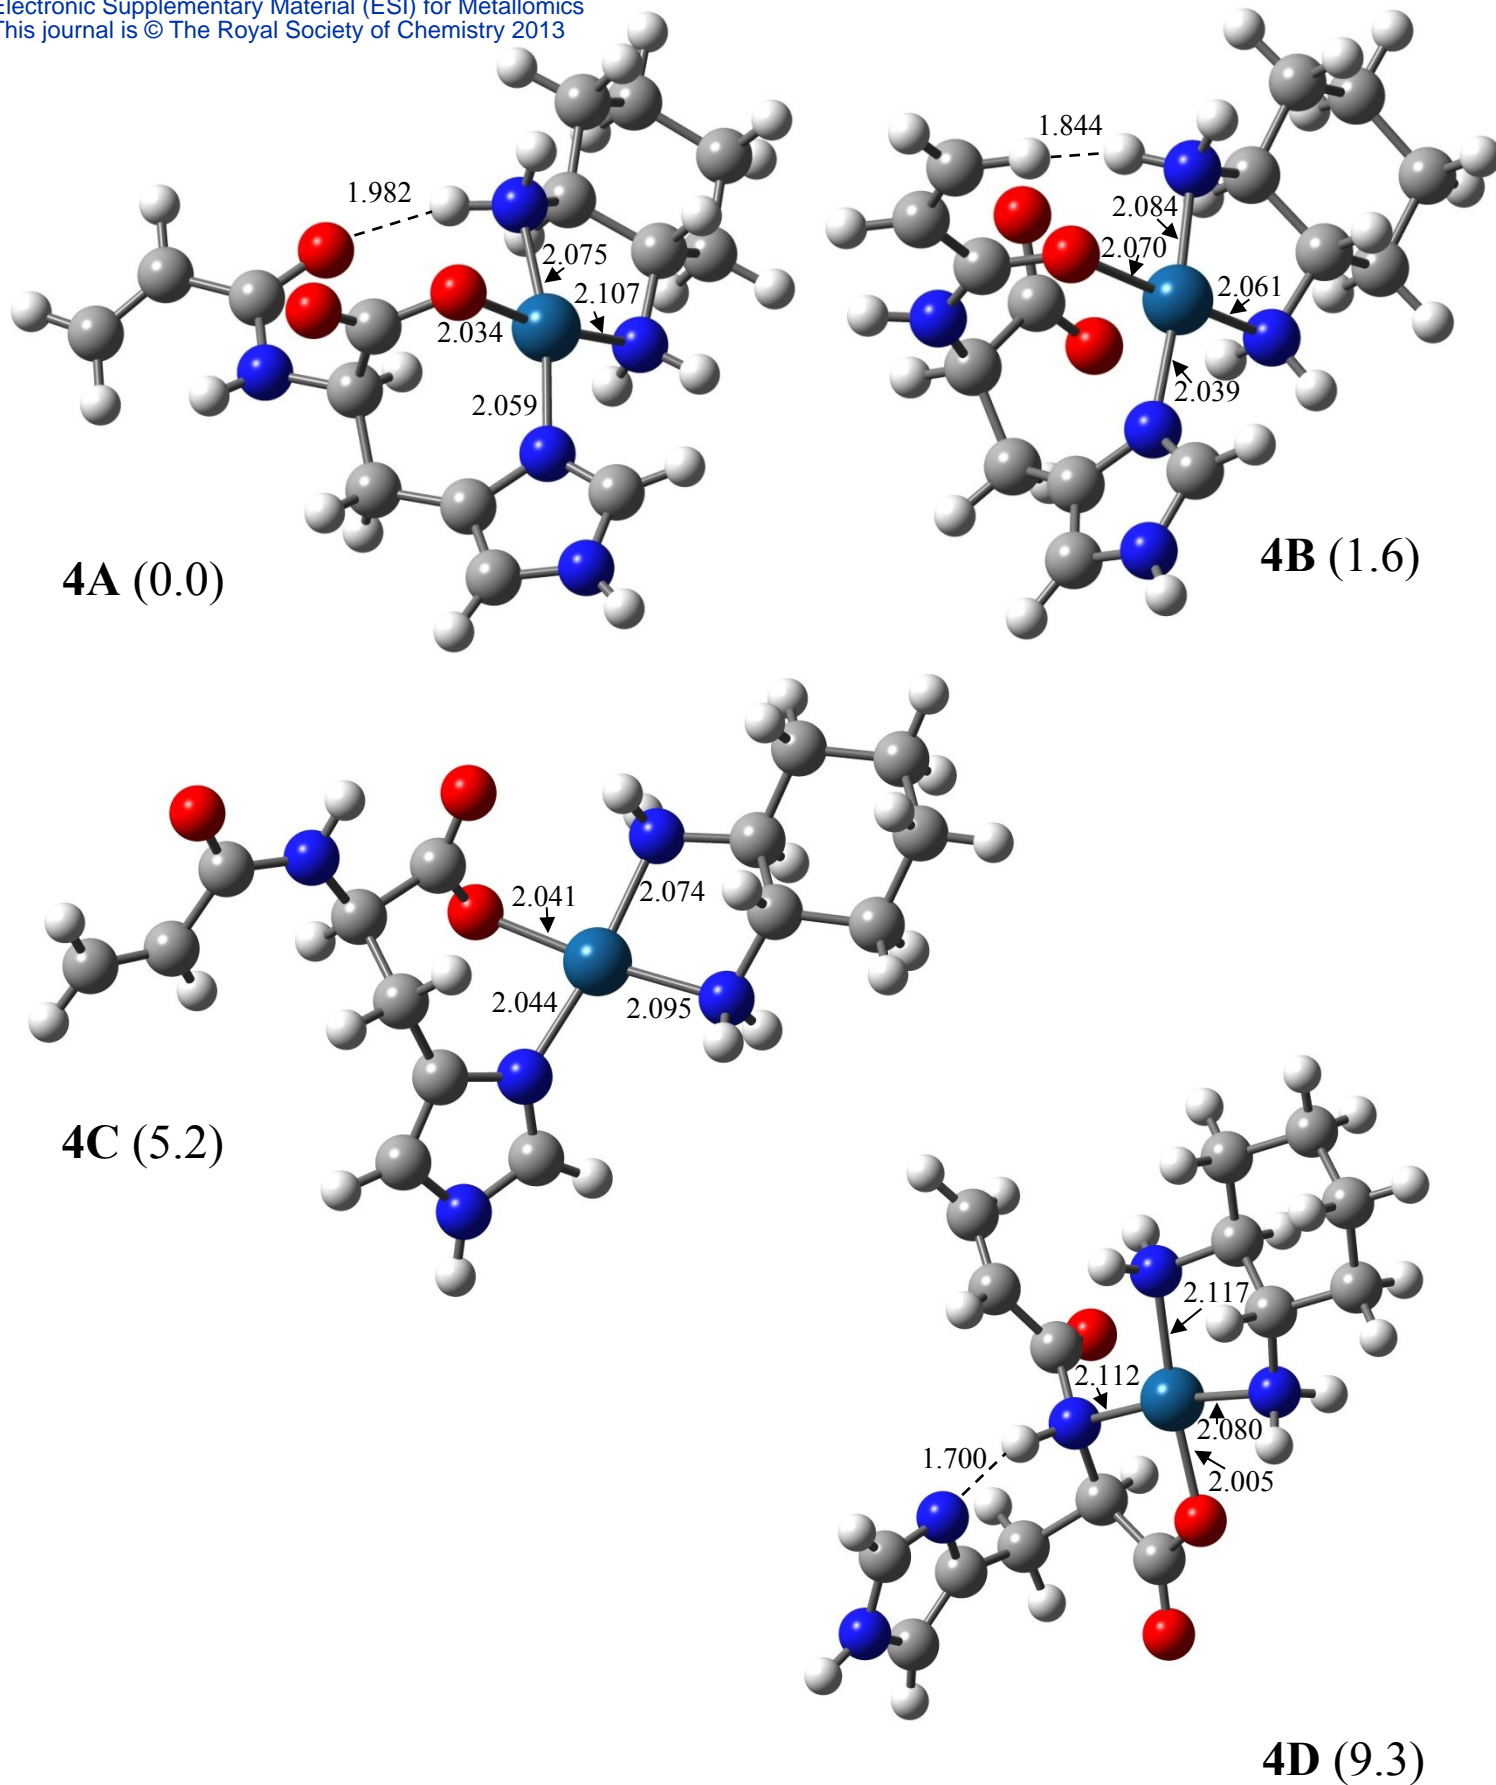

Figure S14: Structures for  $[\text{Carnosine} - \text{NH}_3 - \text{H} + \text{Pt}(\text{dach})]^+$  ions as calculated at the B3LYP/LANL2DZ level of theory. Bond lengths are in Angstroms, relative free energies are indicated in parenthesis.
